# Supplementary material for: Nanocomposite hydrogels with high strength cross-linked by titania
Source: Royal Society of Chemistry journal article supplement (doi:10.1039/c3ra41350k), 2013-01-01
Supplement: c3ra41350k.pdf [file c3ra41350k.pdf]

## **Nanocomposite Hydrogels with High Strength Cross-linked by Titania**

Bo Xu, Huanjun Li<sup>\*</sup>, Yuyang Wang, Gongzheng Zhang, Qingshan Zhang

Department of Applied Chemistry & Pharmaceutical, School of Chemical Engineering and  
Environment, Beijing Institute of Technology,  
Beijing, 100081, China

Phone: +86-10-6891-8530; Fax: + 86-10-6891-8530;

E-mail: [lihj@bit.edu.cn](mailto:lihj@bit.edu.cn)

## Experimental

### ***Materials:***

Acrylic acid (98%, Bodi Co., China), N,N-dimethylacrylamide (99%, Kohjin Co., Japan) were purified by reduced pressure distillation and filtering through activated alumina, respectively. Colloidal titania (anatase; size=15~20nm in diameter; Wanjing Co., China) and other reagents, *e.g.*, Potassium persulfate (KPS) (99.5%, Bodi Co., China) and N,N,N',N'-tetramethyldiamine(TEMED) (99%, Sinopharm Chemical Reagent, China) were used as received without further purification. The water used in all experiments including swelling measurements was purified by a Millipore Direct-Q purification system and bubbled with N<sub>2</sub> for 3h before use.

### ***Preparation of hydrogels:***

11.5g TiO<sub>2</sub> colloidal solution (15%, W<sub>TiO<sub>2</sub></sub>/W<sub>water</sub>) was firstly bubbled with N<sub>2</sub> for 1h to remove any soluble O<sub>2</sub>. Then, an appropriate amount of AA and DMAA were added into the former solution under stirring. After stirring for another 15min, the solution was cooled to 0°C before catalyst(TEMED, 8 μl) and initiator(0.01g in 0.5ml water) were added. Finally, the solution was transformed to different vessels, and free radical polymerization was allowed to carry out for 24h in a 20°C water bath. The hydrogels obtained were washed thoroughly with distilled water to remove the unreacted monomer and other impurities, and the water on the surface of hydrogels was then swept by filter paper.

### ***Heat-treatment of hydrogels:***

The TNC10 gels with different shapes were placed into drying ovens without taking from glass vessels. After heating for certain time at different temperatures, the samples were cooled to room temperature and taken out. The obtained hydrogels were cleaned by the same way as that of as-prepared samples.

### ***Measurements and characterizations:***

The TEM images of TiO<sub>2</sub> NPs were taken by a Tecnai G20 (FEI) at an acceleration

voltage of 80 kV. FT-IR spectra were performed with a Nicolet 6700 instrument (Thermal Scientific, USA) by the KBr method in the range 500–4000  $\text{cm}^{-1}$ . The mechanical properties of hydrogels were measured on an ASG-J electronic universal testing machine (Shimadzu Co., Japan) at room temperature. Clubbed samples with size of  $\Phi 6.3\text{mm} \times 40\text{mm}$  (gauge length, 20 mm) were used for tensile tests with a crosshead speed of  $20\text{mm min}^{-1}$ . Cylindroid samples with size of  $\Phi 10\text{mm} \times 10\text{mm}$  were used for compressive tests with a crosshead speed of  $5\text{mm min}^{-1}$ . The strength and modulus were calculated by the stress-strain curves based on the initial cross-section area of hydrogel samples. Swelling measurements were carried out with a gravitational method. Hydrogel samples with size of  $\Phi 6.3\text{mm} \times 2\text{mm}$  were immersed in a water bath with temperature of  $20^\circ\text{C}$ , and weighed after certain interval before sweeping the water on surfaces. The swelling ratio (SR) was determined as:  $\text{SR} \% = (\text{swollen mass}/\text{initial mass})$ .

***Shape memory behaviors of hydrogels:***

Shape memory behaviors were conducted on TNC10 gels heat treated by  $80^\circ\text{C}$  for 12h. Straight or U-shaped hydrogels(original shapes) were firstly immersed in water until swelling equilibrium. Then the swollen samples were hand-made into alternative shapes (straight to U-shape and U-shaped to straight) and fixed by special vessels. After that, hydrogels were placed in  $60^\circ\text{C}$  drying oven for 30min. Next, the hydrogels were placed into distilled water at room temperature and observe the recovery behaviors of hydrogels.

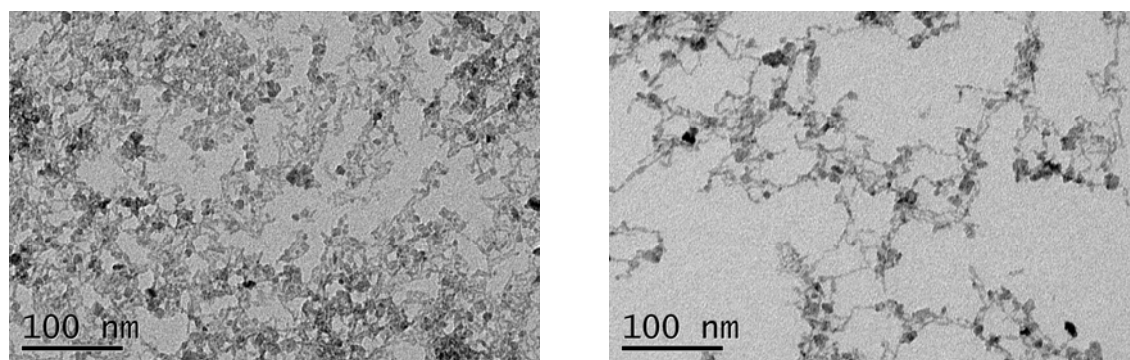

**Figure S1** TEM images of TiO<sub>2</sub> nanoparticles.

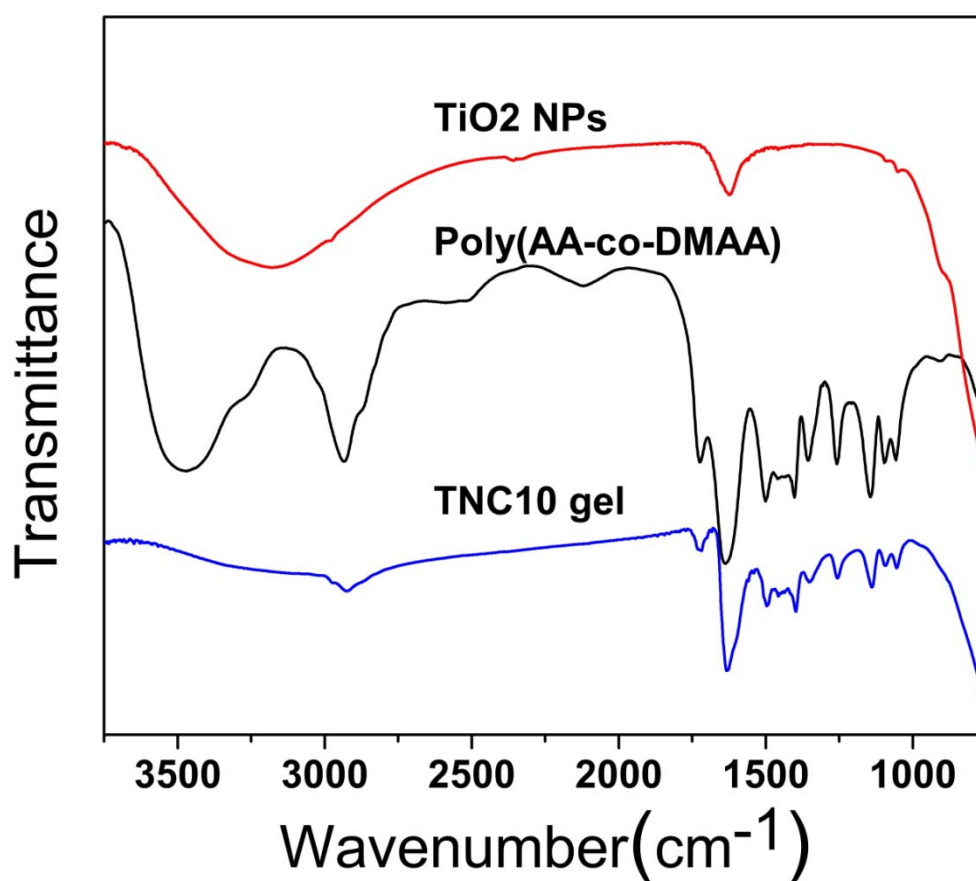

**Figure S2** FT-IR spectra of TiO<sub>2</sub> NPs, Poly(AA-co-DMAA)(1:9) and dried TNC10 gel. The broad absorption peak of TiO<sub>2</sub> NPs at 3177 cm<sup>-1</sup> is attributed to -OH on TiO<sub>2</sub> surface. The absorption peak of Poly(AA-co-DMAA) at 3465 cm<sup>-1</sup>, 2927 cm<sup>-1</sup>, 1631 cm<sup>-1</sup> are attributed to -OH, -CH<sub>3</sub> and C=O, respectively. However, the broad absorption peak at 3177 cm<sup>-1</sup> and 3465 cm<sup>-1</sup> are disappeared, indicating the strong interactions between hydroxy groups on TiO<sub>2</sub> and carboxyl groups on polymer chains.

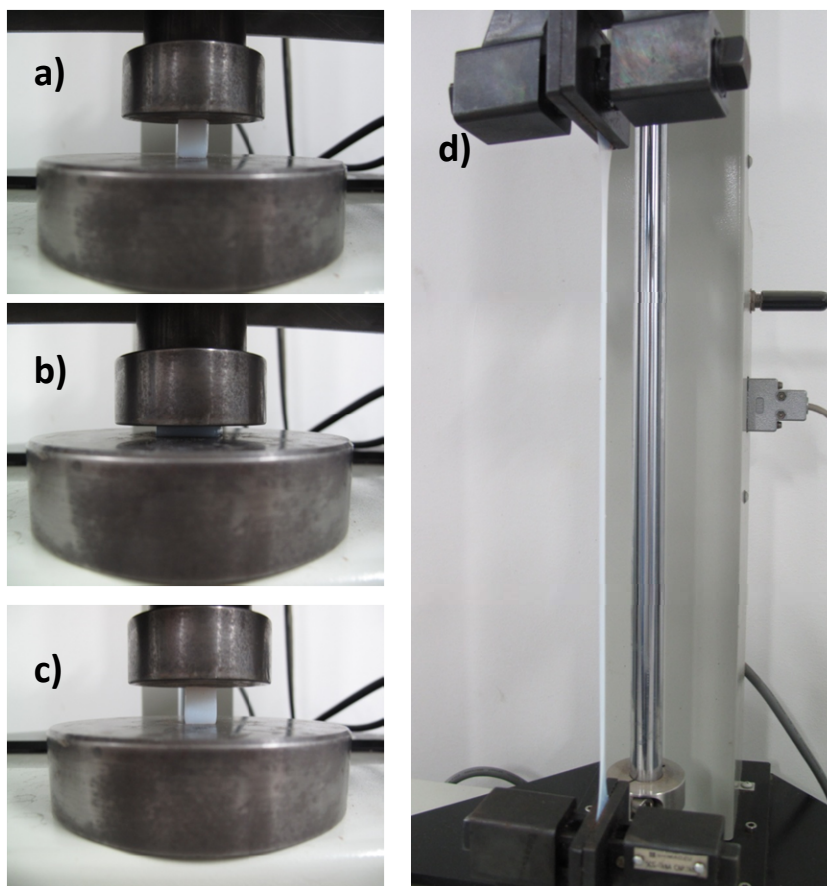

Fig. S3 Photographs of TNC10 gels a) before compression; b) compressed 95%; c) after compression; d) during tensile tests.

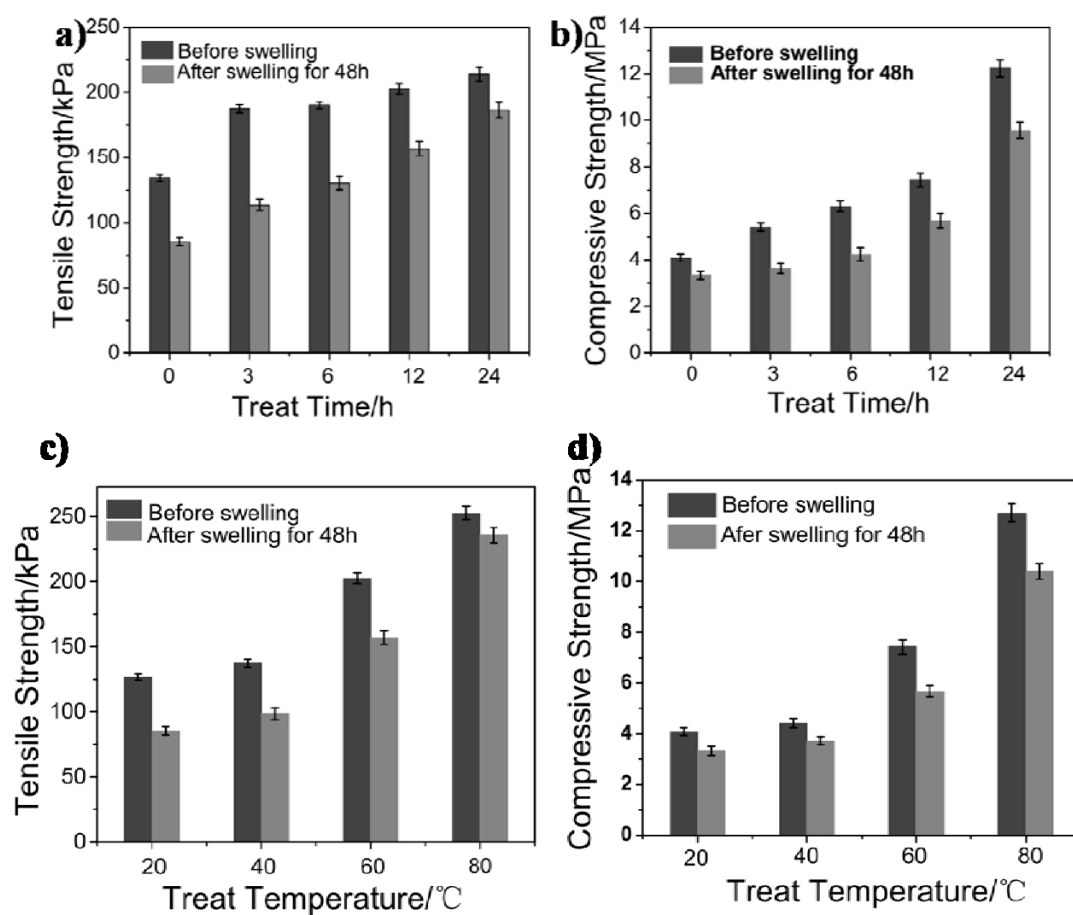

Fig. S4 The mechanical strength of heat treated TNC10 gels before and after swelling. **a)-b)** TNC10 gels treated for different time at 60°C; **c)-d)** TNC10 gels treated at different temperature for 12h.
